# Supplementary material
Source: PubMed Central journal article supplement (PMC3973657)
Supplement: auto-8-1175-s01.pdf [file auto-8-1175-s01.pdf]

## **Supplemental Material to:**

**Sylvain Ladoire, Kariman Chaba, Isabelle Martins,  
Abdul Qader Sukkurwala, Sandy Adjemian,  
Mickaël Michaud, Vichnou Poirier-Colame,  
Felipe Andreiuolo, Lorenzo Galluzzi, Eileen White,  
Mathias Rosenfeldt, Kevin M. Ryan, Laurence Zitvogel  
and Guido Kroemer**

**Immunohistochemical detection of cytoplasmic LC3  
puncta in human cancer specimens**

**Autophagy 2012; 8(8)**

**<http://dx.doi.org/10.4161/auto.20353>**

**[www.landesbioscience.com/journals/autophagy/article/20353](http://www.landesbioscience.com/journals/autophagy/article/20353)**

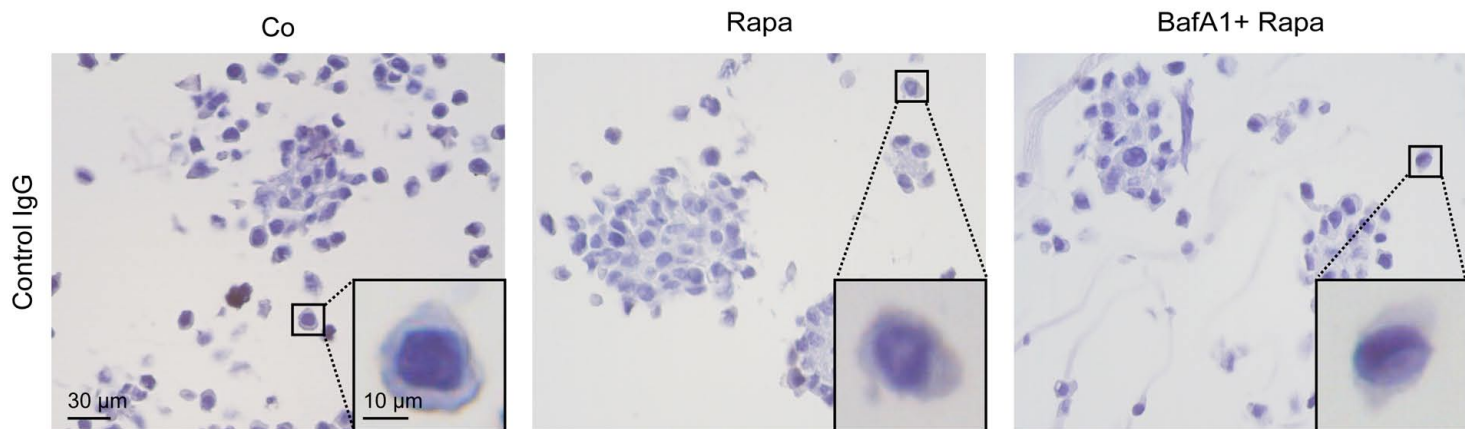

**Suppl. Figure 1**

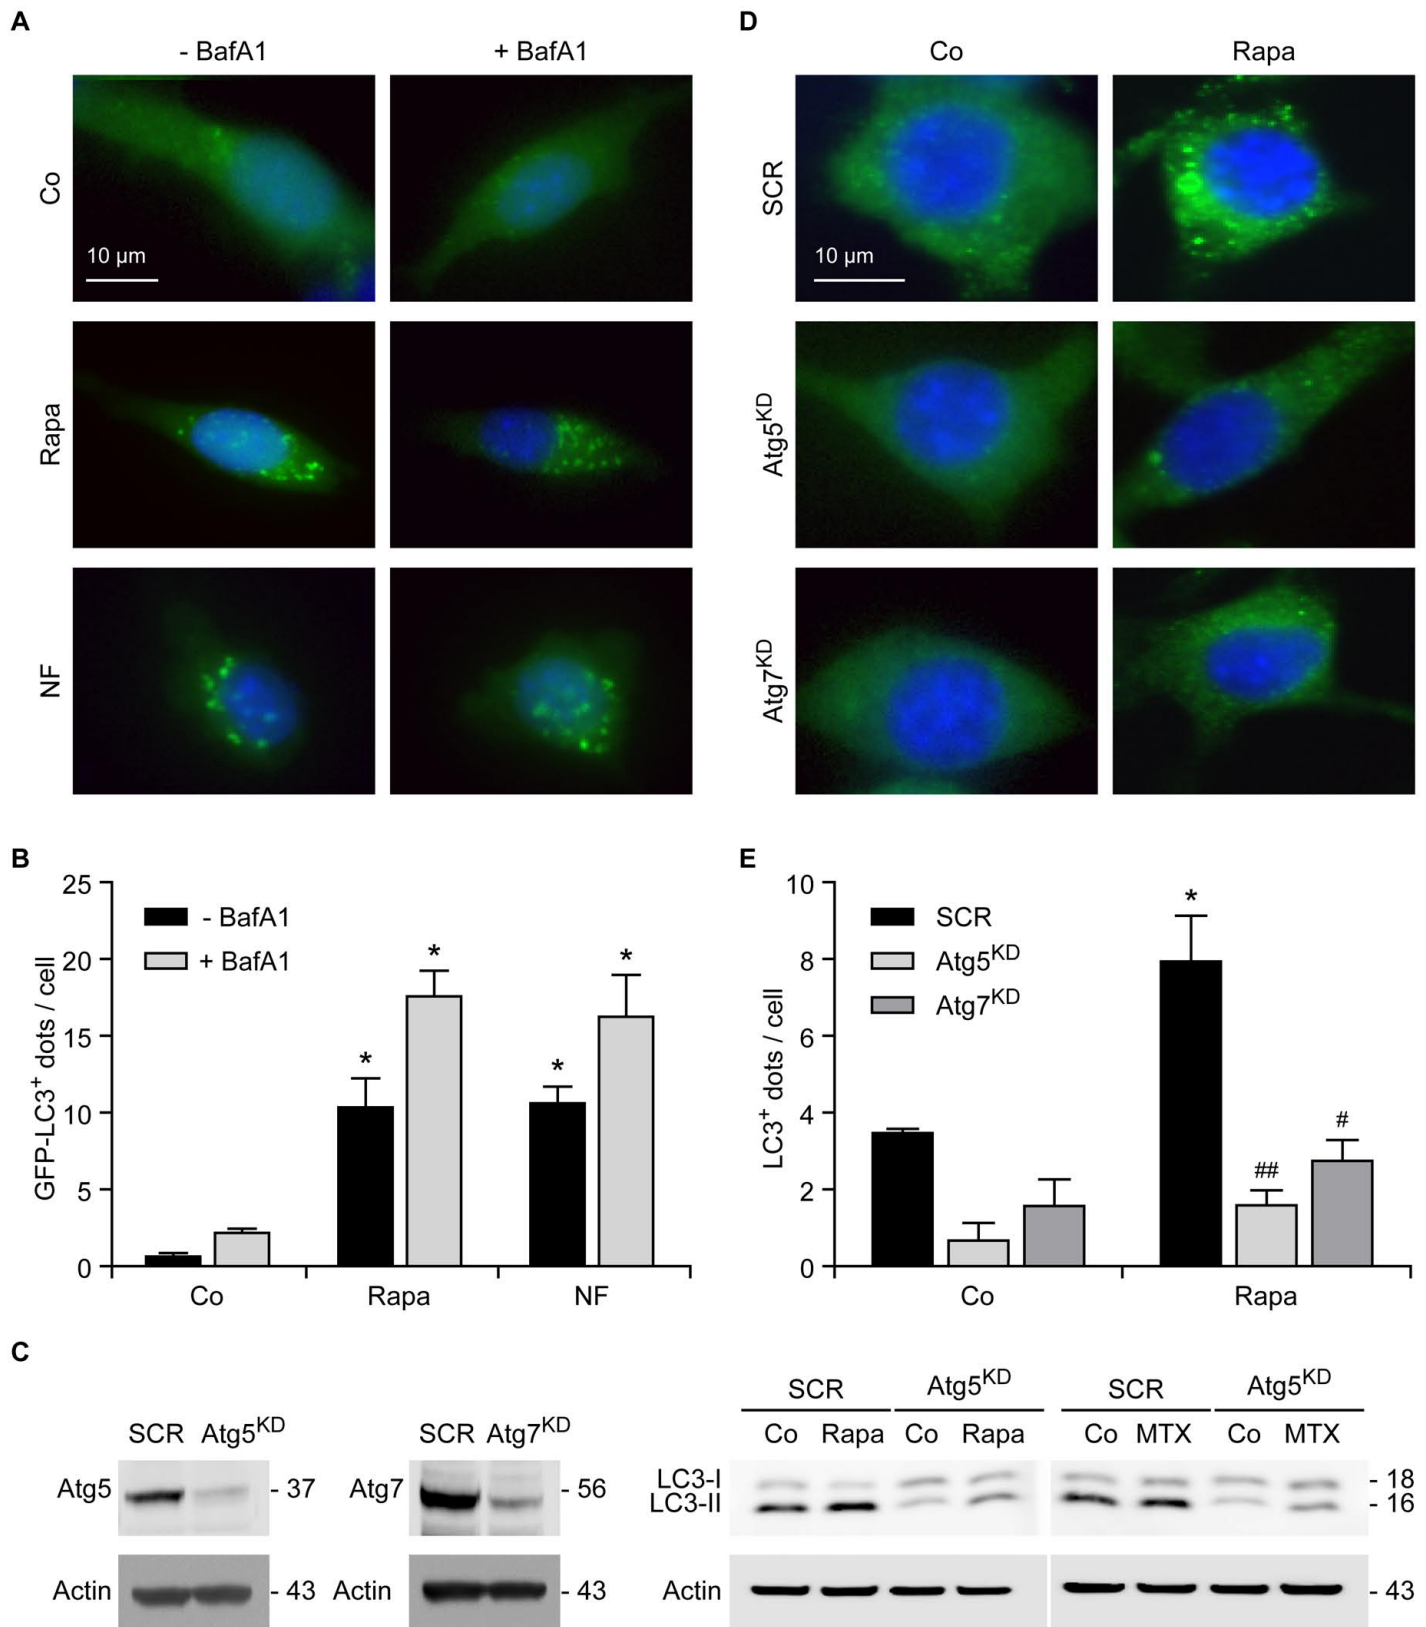

Suppl. Figure 2

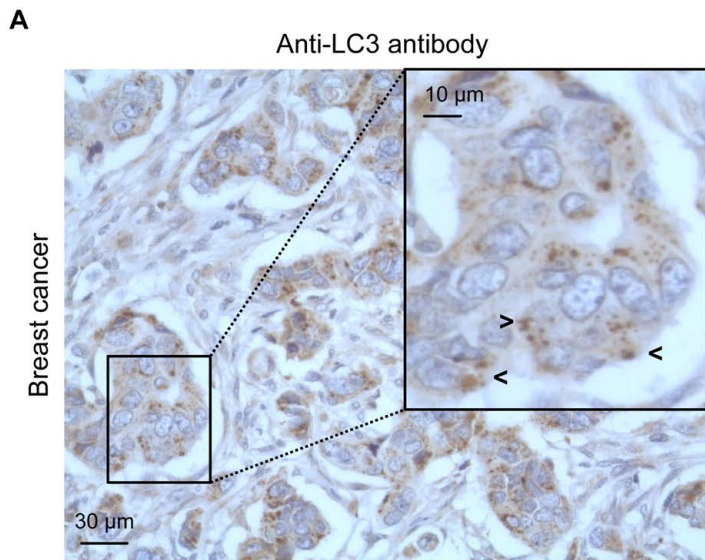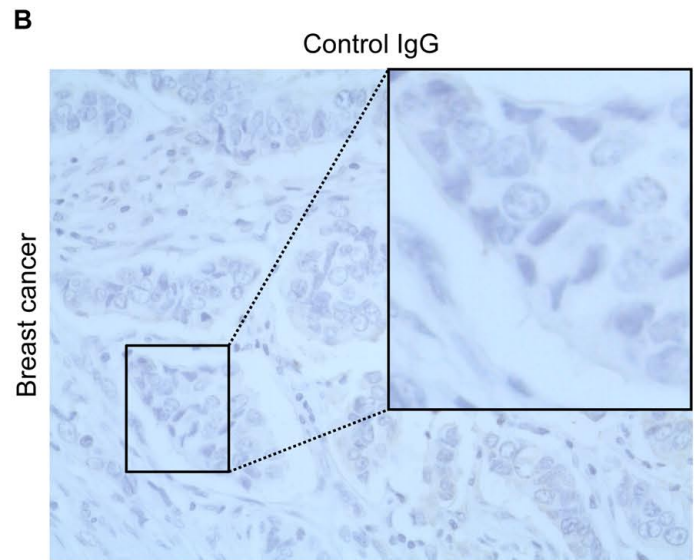

**Suppl. Figure 3**

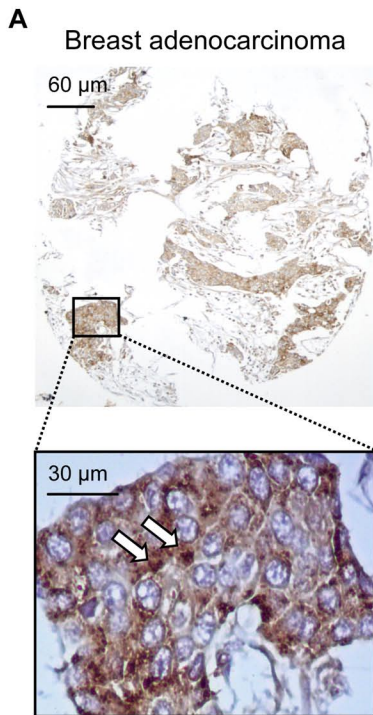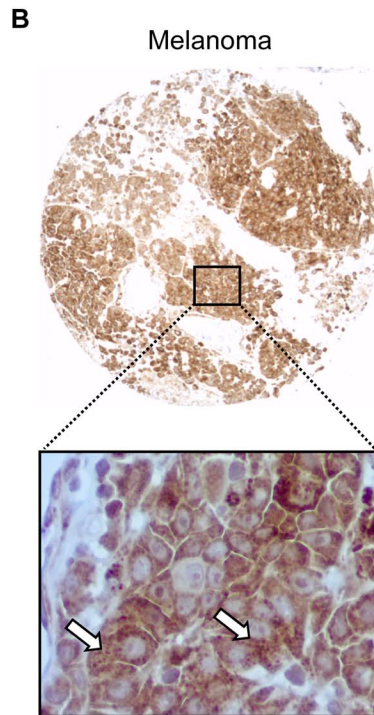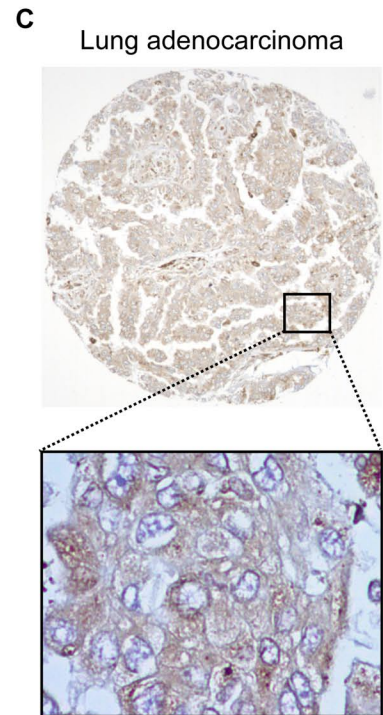

**Suppl. Figure 4**

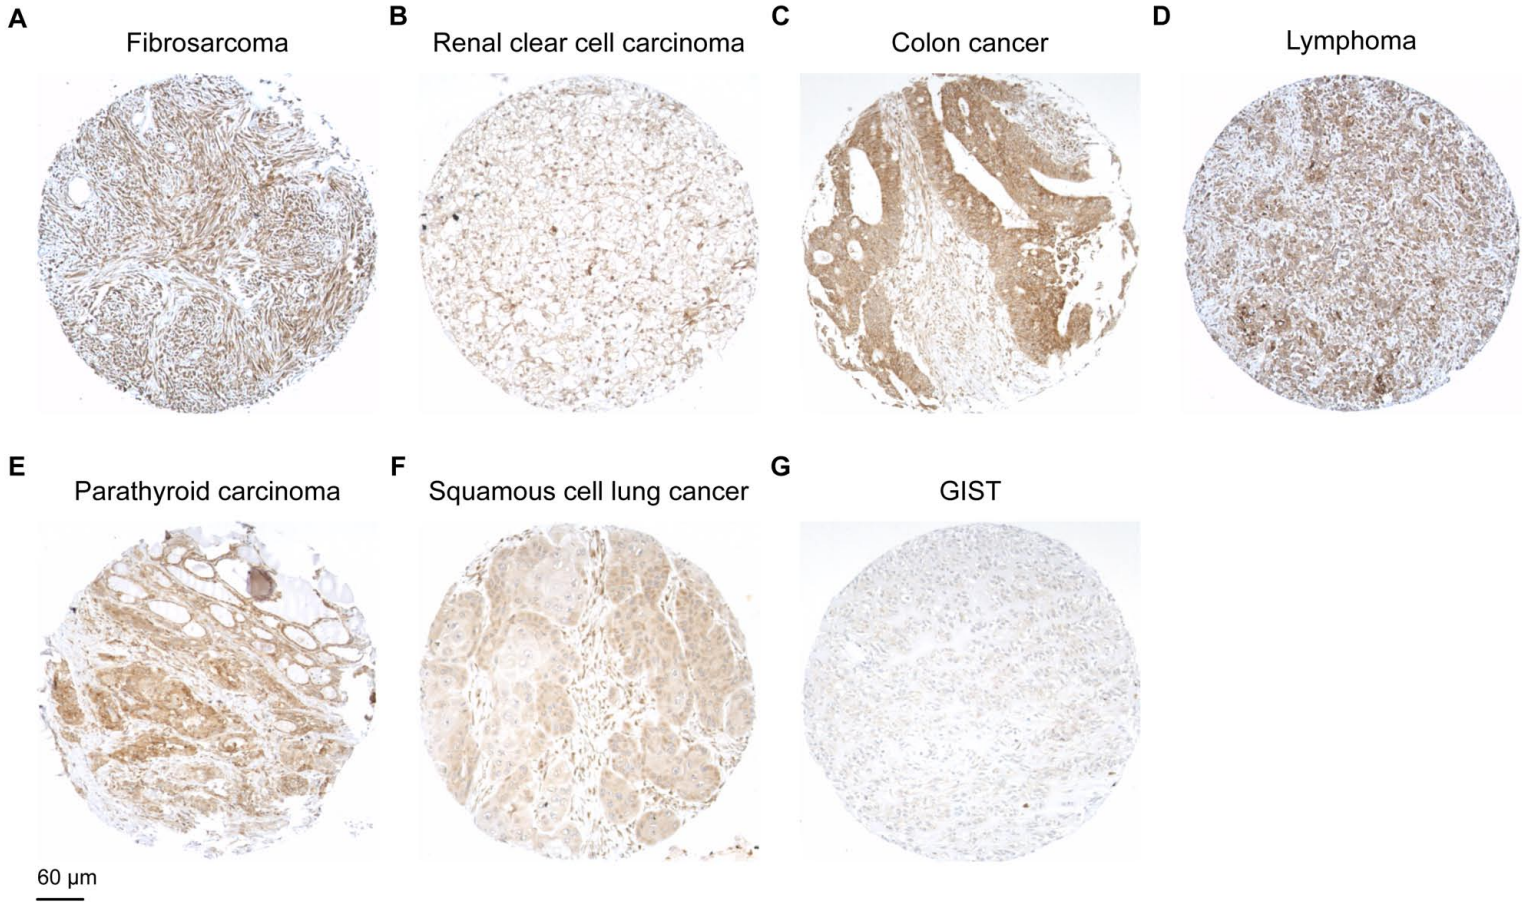

**Suppl. Figure 5**

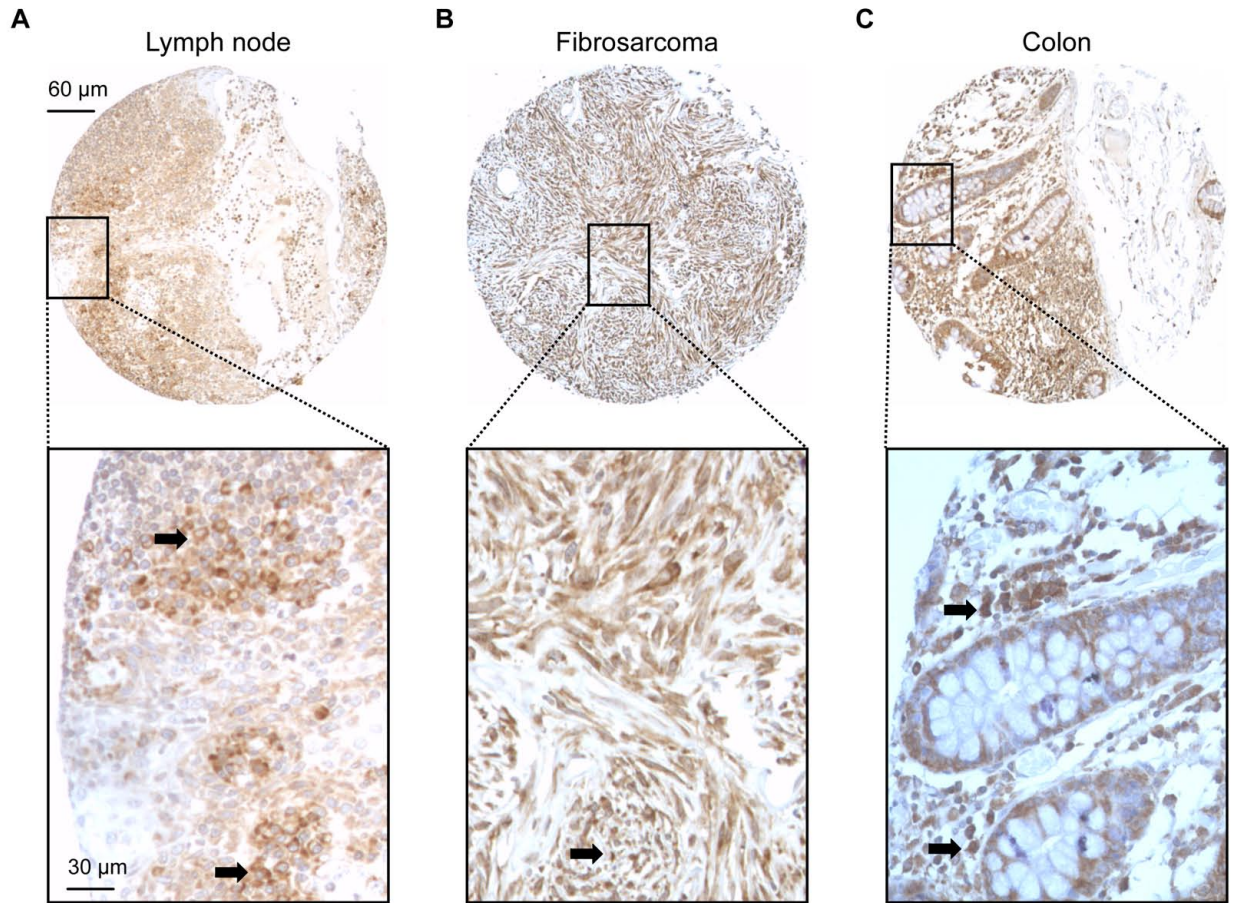

**Suppl. Figure 6**

## Legends to Supplemental Figures

**Supplemental Figure 1. Specificity of LC3 detection by immunohistochemistry in cell pellets.** Mouse colon carcinoma CT26 cells were left untreated (Co) or treated with 10  $\mu$ M rapamycin (Rapa), either in the absence or in the presence of 1  $\mu$ g/mL bafilomycin A1 (BafA1), for 8 h. Thereafter, cells were processed for the immunohistochemical detection of LC3, upon replacement of the LC3-specific antibody with an isotype matched unspecific IgG. Representative images are provided. Scale bars = 10 or 30  $\mu$ m, as indicated.

**Supplemental Figure 2. (Immuno)fluorescence microscopy-assisted detection of LC3 in autophagy-proficient and autophagy-deficient cancer cells. A,B.** Murine colon carcinoma CT26 cells stably expressing a GFP-LC3 fusion protein were left untreated (Co), treated with 10  $\mu$ M rapamycin (Rapa) or maintained in nutrient-free (NF) conditions, in the absence or in the presence of 1  $\mu$ g/mL bafilomycin A1 (BafA1) for the indicated time. Thereafter, cells were fixed and analyzed for the presence of GFP-LC3<sup>+</sup> cytoplasmic dots. **C-E.** Alternatively, CT26 cells expressing a control shRNA (SCR cells) as well as cells expressing Atg5- (Atg5<sup>KD</sup>) or Atg7-specific (Atg7<sup>KD</sup>) shRNAs were kept in control conditions or treated with 10  $\mu$ M rapamycin or 4  $\mu$ M mitoxantrone (MTX) for 8 h. Thereafter, cells were processed for the immunoblotting-assisted detection of Atg5, Atg7 and LC3 (**C**), or for the immunofluorescence-based quantification of the LC3-I $\rightarrow$ LC3-II conversion (**D,E**). Representative images (**A,C,D**) and quantitative data (**B,E**) are shown. Scale bar = 10  $\mu$ m. In **B** and **E**, columns report the number of GFP-LC3<sup>+</sup> or LC3<sup>+</sup> cytoplasmic dots/cell, respectively. Data are presented as means  $\pm$  SEM (n = 3; \* =  $p < 0.05$ , Student's *t* test, compared to WT or SCR cells maintained in control conditions; # =  $p < 0.05$ , ## =  $p < 0.001$ , Student's *t* test, as compared to WT or SCR cells treated with the same autophagic trigger in



the absence of BafA1). In **C**, actin levels were monitored to ensure equal loading of lanes, and molecular weights are reported.

**Supplemental Figure 3. Specificity of LC3 detection by immunohistochemistry in human tissue sections.** **A,B.** Breast adenocarcinoma tissue sections were subjected to the immunohistochemical detection of LC3, either in standard conditions (**A**) or upon replacement of the LC3-specific antibody with an isotype matched unspecific IgG (**B**). Representative images are provided. Scale bars = 10 or 30  $\mu\text{m}$ , as indicated. Arrowheads depict LC3<sup>+</sup> dots.

**Supplemental Figure 4. Patterns of LC3 expression in human tumors contained in tissue microarrays.** **A-C.** Tissue microarrays encompassing distinct neoplastic tissues were stained for the immunohistochemical detection of LC3, as detailed in Materials and Methods. Representative staining patterns are reported: LC3 puncta (white arrows) in breast adenocarcinoma (**A**) and melanoma (**B**), diffuse cytoplasmic distribution of LC3 in lung adenocarcinoma (**C**). Scale bars = 30 or 60  $\mu\text{m}$ , as indicated.

**Supplemental Figure 5. LC3 staining performed on different tumor types contained in a tissue microarray.** **A**, fibrosarcoma; **B**, renal clear cell carcinoma; **C**, colon cancer; **D**, lymphoma; **E**, parathyroid carcinoma; **F**, squamous cell lung cancer; **G**, gastrointestinal stromal tumor (GIST). Scale bars = 60  $\mu\text{m}$ .

**Supplemental Figure 6 LC3 staining of immune cells.** **A.** Strongly LC3-positive immune cells (black arrows) in a normal lymph node. **B.** Stromal immune cells (black arrow) in the proximity of fibrosarcoma cells. **C.** Immune cells (black arrows) close to non-malignant colon epithelial cells. Scale bars = 30 or 60  $\mu\text{m}$ , as indicated.

**Supplemental Table 1. LC3 staining patterns of 49 different samples included in a tissue microarray.**

| <b>Tissue Origin</b>         | <b>Diffuse weak cytoplasmic</b> | <b>Diffuse strong cytoplasmic</b> | <b>Diffuse strong cytoplasmic + puncta</b> |
|------------------------------|---------------------------------|-----------------------------------|--------------------------------------------|
| <i>Malignant tissues</i>     |                                 |                                   |                                            |
| Breast adenocarcinoma 1      |                                 |                                   |                                            |
| Breast adenocarcinoma 2      |                                 |                                   | 40%                                        |
| Breast adenocarcinoma 3      |                                 |                                   |                                            |
| Colon adenocarcinoma         |                                 |                                   | 50%                                        |
| Fibrosarcoma                 |                                 |                                   | 80%                                        |
| GIST                         |                                 |                                   |                                            |
| Glioblastoma 1               |                                 |                                   |                                            |
| Glioblastoma 2               |                                 |                                   | 30%                                        |
| Glioblastoma 3               |                                 |                                   | 50%                                        |
| Hepatocellular carcinoma     |                                 |                                   | 100%                                       |
| Lung adenocarcinoma 1        |                                 |                                   |                                            |
| Lung adenocarcinoma 2        |                                 |                                   | 50%                                        |
| Lung adenocarcinoma 3        |                                 |                                   |                                            |
| Lung squamous cell carcinoma |                                 |                                   |                                            |
| Lymphoma                     |                                 |                                   | 50%                                        |
| Medulloblastoma 1            |                                 |                                   | 100%                                       |
| Medulloblastoma 2            |                                 |                                   |                                            |
| Medulloblastoma 3            |                                 |                                   | 80%                                        |
| Melanoma                     |                                 |                                   | 90%                                        |
| Meningioma 1                 |                                 |                                   |                                            |
| Meningioma 2                 |                                 |                                   |                                            |
| Meningioma 3                 |                                 |                                   |                                            |
| Oligodendroglioma 1          |                                 |                                   | 50%                                        |
| Oligodendroglioma 2          |                                 |                                   | 30%                                        |
| Oligodendroglioma 3          |                                 |                                   |                                            |
| Parathyroid carcinoma 1      |                                 |                                   |                                            |
| Parathyroid carcinoma 2      |                                 |                                   |                                            |
| Parathyroid carcinoma 3      |                                 |                                   | 30%                                        |
| Prostate adenocarcinoma      |                                 |                                   |                                            |
| Renal clear cell carcinoma   |                                 |                                   |                                            |
| Testicular seminoma          |                                 |                                   |                                            |

*Normal tissues*

|                         |  |     |
|-------------------------|--|-----|
| Cerebellum 1            |  |     |
| Cerebellum 2            |  |     |
| Cerebral cortex         |  | 30% |
| Cerebral cortex         |  | 30% |
| Cerebral white matter 1 |  |     |
| Cerebral white matter 2 |  |     |
| Colon                   |  |     |
| Hippocampus 1           |  |     |
| Hippocampus 2           |  | 50% |
| Kidney                  |  |     |
| Liver 1                 |  |     |
| Liver 2                 |  |     |
| Liver 3                 |  |     |
| Lung                    |  |     |
| Lymph node 1            |  |     |
| Lymph node 2            |  |     |
| Placenta                |  |     |
| Skin                    |  |     |
| Thyroid                 |  |     |

The % of cells exhibiting LC3<sup>+</sup> cytoplasmic dots is reported.
